# Supplementary material
Source: PubMed Central journal article supplement (PMC1544216)

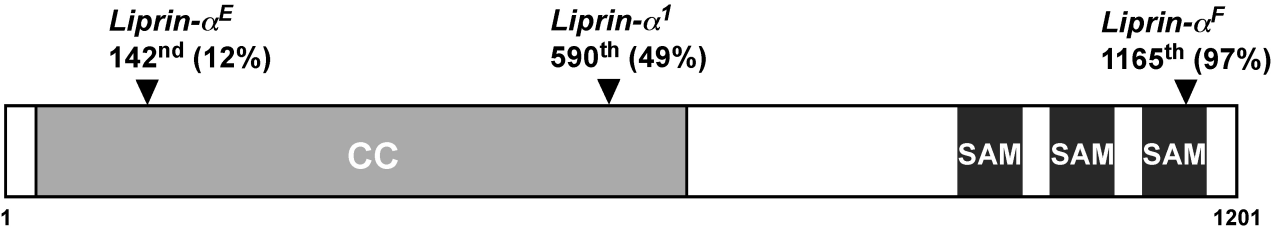

Supplement: pnas_0601185103_1.pdf [file pnas_0601185103_1.pdf]

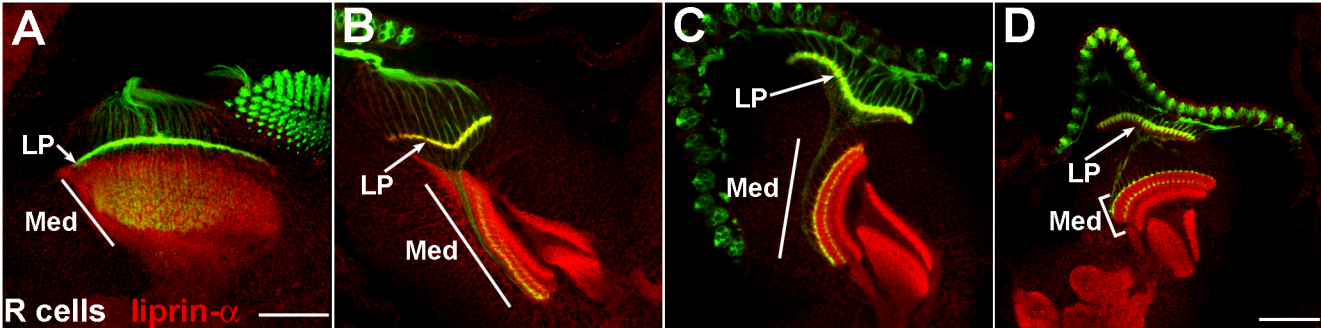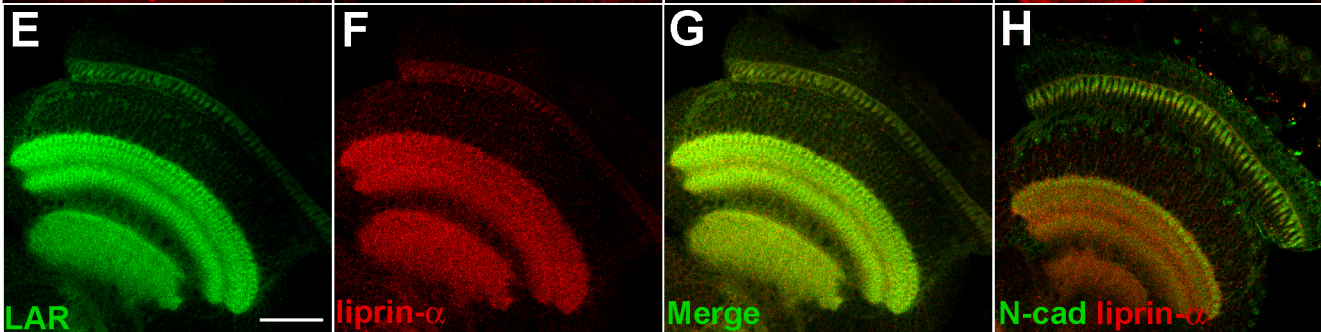

Supplement: pnas_0601185103_2.pdf [file pnas_0601185103_2.pdf]
